# Supplementary material
Source: PubMed Central journal article supplement (PMC7609734)
Supplement: 13311_2020_841_MOESM3_ESM.pdf [file 13311_2020_841_MOESM3_ESM.pdf]

**Supplementary Fig. 1** Chemical structures of DBK-1154 and DBK-1160

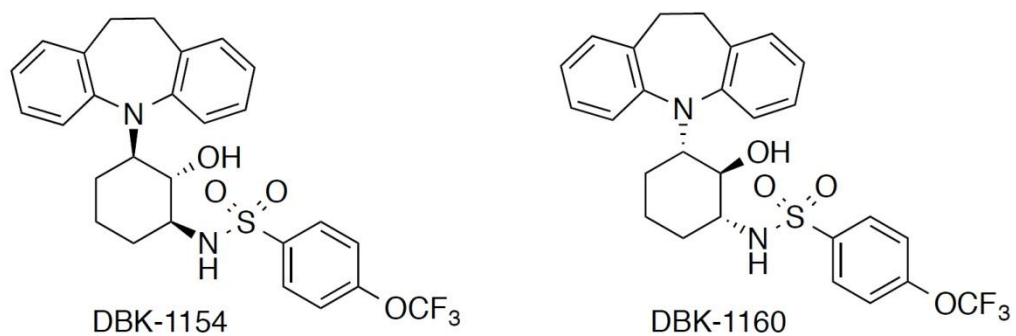

**Supplementary Table 1** Microsome Stability for DBK-1154 and DBK-1160

| Species | DBK-1154                |                              |                               | DBK-1160                |                              |                               |
|---------|-------------------------|------------------------------|-------------------------------|-------------------------|------------------------------|-------------------------------|
|         | T <sub>1/2</sub><br>min | %<br>remaining<br>at 60 min. | CL <sub>int</sub><br>mL/hr/kg | T <sub>1/2</sub><br>min | %<br>remaining<br>at 60 min. | CL <sub>int</sub><br>mL/hr/kg |
| human   | 13.5                    | 3.7                          | 237                           | 26.6                    | 17.7                         | 121                           |
| rat     | 7.3                     | 0.4                          | 683                           | 12.1                    | 2.8                          | 411                           |
| mouse   | 4.6                     | 0.1                          | 2363                          | 9.0                     | 1.3                          | 1211                          |

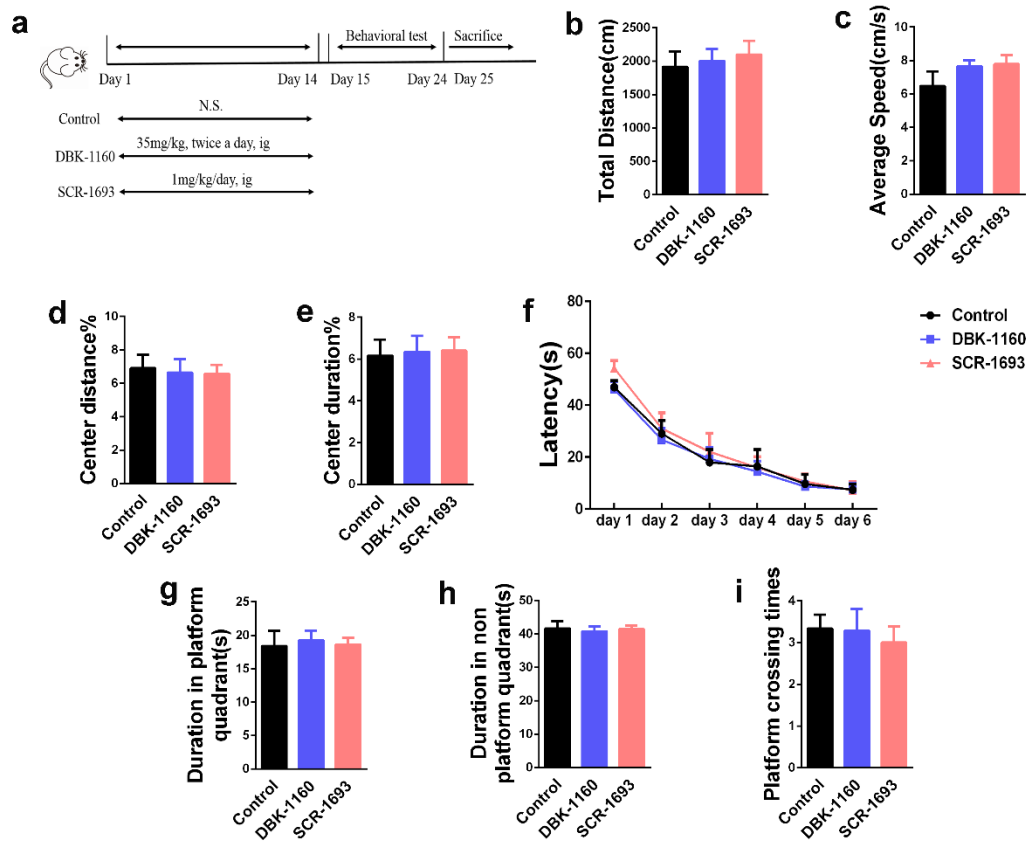

**Supplementary Fig.2** DBK-1160 or SCR1693 treatment alone does not influence the general motor activity and cognitive function of normal rats. **(a)** Animal experiment timeline performed in the study. **(b-e)** The total distance, average speed, center distance/total distance and center duration/total duration were analyzed in the open field test. **(f)** Escape latency in six days were analyzed in the Morris water maze (MWM). **(g-i)** The duration in platform quadrant and non-platform quadrants, as well as platform crossing times on test day were analyzed in MWM. Data represent mean  $\pm$  SEM, Control group (treated with normal saline) n=6, DBK-1160 group (treated with DBK-1160) n=7, SCR-1693 group (treated with SCR-1693) n=7

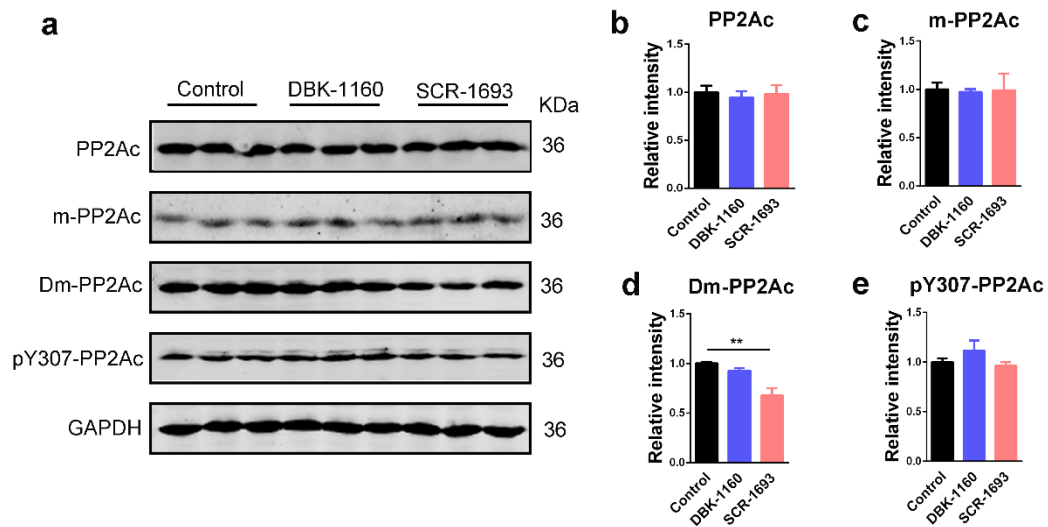

**Supplementary Fig.3** DBK-1160 treatment alone does not change the post-translational modifications and activities of PP2A in normal rats. **(a)** Western blots for the catalytic subunit of PP2A (PP2Ac), methylated PP2Ac (m-PP2Ac), demethylated PP2Ac (Dm-PP2Ac) and phosphorylated PP2Ac at Y307 (pY307-PP2Ac) in rat hippocampus. **(b-e)** Quantification of the relative protein levels (PP2Ac, m-PP2Ac, Dm-PP2Ac and pY307-PP2Ac) after normalization to the GAPDH signal. Data represent mean  $\pm$  SD,  $n=3$ ,  $**P < 0.01$

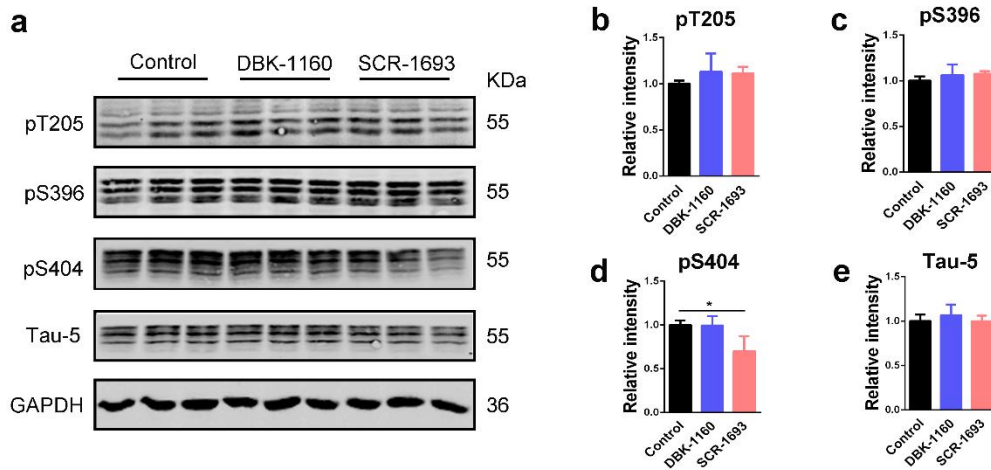

**Supplementary Fig.4** DBK-1160 treatment alone has no effect on tau phosphorylation in normal rats. **(a)** Western blots for tau phosphorylation levels at the sites of pT205, pS396, pS404 and total tau (Tau-5) in rat hippocampus. **(b-e)** Quantification of the relative protein expression levels (pT205, pS396, pS404, and Tau-5) after normalization to the GAPDH signal. Data represent mean  $\pm$  SD,  $n=3$ ,  $*P < 0.05$

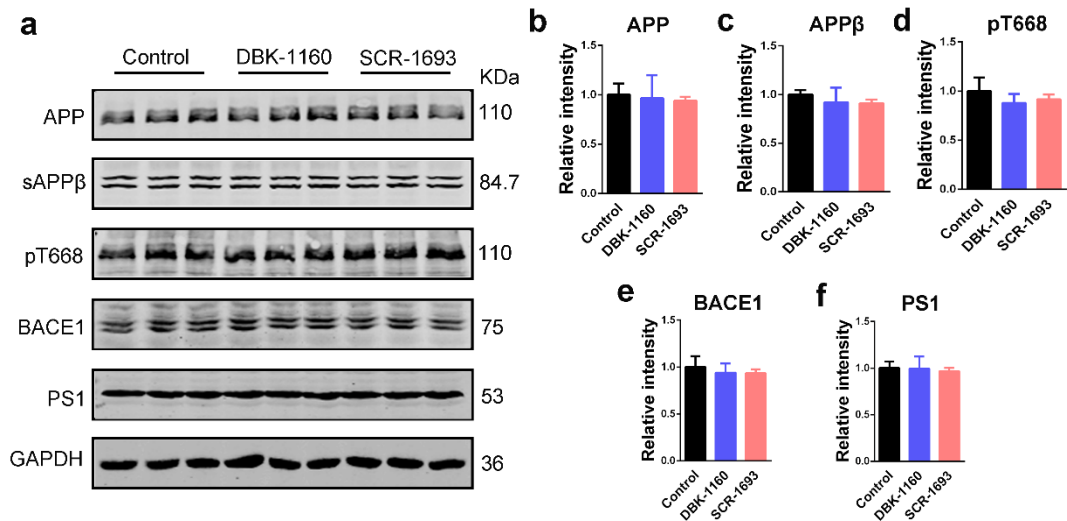

**Supplementary Fig.5** DBK-1160 treatment alone does not change APP, BACE1 and PS1 expression and APP-T668 phosphorylation in normal rats. **(a)** Western blots for APP, sAPP $\beta$ , pT668APP, BACE1 and PS1 in rat hippocampus. **(b-f)** Quantification of the relative protein levels (APP, sAPP $\beta$ , pT668APP, BACE1 and PS1) after normalization to the GAPDH signal. Data represent mean  $\pm$  SD, n=3
